# Supplementary material for: Kinetics and mechanism of the aminolysis of aryl ethyl chloro and chlorothio phosphates with anilines
Source: Royal Society of Chemistry journal article supplement (doi:10.1039/b713167d), 2007-01-01
Supplement: b713167d.pdf [file b713167d.pdf]

## Electronic Supplementary Information

### Kinetics and Mechanism of the Aminolysis of Aryl Ethyl Chloro and Chlorothio Phosphates with Anilines

Md. Ehtesham Ul Hoque, Nilay Kumar Dey, Chan Kyung Kim,

Bon-Su Lee\* and Hai Whang Lee\*

#### Table of Contents

|   |                                                                                                                                                                                                                                                                                                                                       |         |
|---|---------------------------------------------------------------------------------------------------------------------------------------------------------------------------------------------------------------------------------------------------------------------------------------------------------------------------------------|---------|
| 1 | Table S1. Second-order rate constants ( $k_H \times 10^4 / M^{-1} s^{-1}$ , $k_D \times 10^4 / M^{-1} s^{-1}$ ) and kinetic isotope effects, $k_H/k_D$ , for the aminolyses of ethyl Y-phenyl chloro-( <b>1</b> ) and chlorothio-( <b>2</b> ) phosphates with $XC_6H_4ND_2$ in acetonitrile at 55.0 °C                                | S2      |
| 2 | Table S2. Activation parameters of the anilinolysis of (EtO)(YPhO)P(O)Cl ( <b>1</b> ), (EtO)(YPhO)P(S)Cl ( <b>2</b> ), (PhO)(YPhO)P(S)Cl ( <b>4</b> ), and (4-ClPhO)(YPhO)P(S)Cl ( <b>4'</b> ) in acetonitrile at 55.0 °C                                                                                                             | S3      |
| 3 | Substrates                                                                                                                                                                                                                                                                                                                            | S4–S7   |
| 4 | Product analysis                                                                                                                                                                                                                                                                                                                      | S8      |
| 6 | References                                                                                                                                                                                                                                                                                                                            | S9–S10  |
| 7 | Cartesian coordinates and absolute energies of optimized structures of Reactants:<br>Ethyl phenyl chlorophosphate ( <b>1</b> ), Ethyl phenyl chlorothiophosphate ( <b>2</b> ), 4-Nitrophenyl diphenylphosphinate ( <b>5</b> ), 4-Nitrophenyl methylphenylphosphinate ( <b>6</b> ), and 4-Nitrophenyl dimethylphosphinate ( <b>7</b> ) | S11–S15 |
| 8 | The calculated (RHF/6-31G* level) rotation barriers of ethyl (and/or), phenyl and/or phenoxy in <b>1</b> , <b>2</b> , <b>3</b> , and <b>4</b><br>(Table S3, Table S4, Table S5, Table S6, Table S7)                                                                                                                                   | S16–S20 |
| 9 | The bond angles of <b>1</b> , <b>2</b> , <b>3</b> , <b>4</b> , <b>5</b> , <b>6</b> , <b>7</b> , <b>9f</b> , <b>10f</b> , <b>9b</b> , and <b>10b</b><br>(Table S8, Table S9, Table S10, Table S11)                                                                                                                                     | S21–S24 |

**Table S1. Second-order rate constants ( $k_H \times 10^4/\text{M}^{-1} \text{s}^{-1}$ ,  $k_D \times 10^4/\text{M}^{-1} \text{s}^{-1}$ ) and kinetic isotope effects,  $k_H/k_D$ , for the aminolyses of ethyl Y-phenyl chloro-(1) and chlorothio-(2) phosphates with  $\text{XC}_6\text{H}_4\text{ND}_2$  in acetonitrile at 55.0 °C**

|          | X     | Y     | $k_H$             | $k_D$             | $k_H/k_D$         |
|----------|-------|-------|-------------------|-------------------|-------------------|
|          | 4-MeO | 4-MeO | $113 \pm 7^a$     | $104 \pm 1^a$     | $1.09 \pm 0.07^a$ |
|          | 4-MeO | H     | $182 \pm 9$       | $153 \pm 4$       | $1.19 \pm 0.07$   |
|          | 4-MeO | 4-Cl  | $328 \pm 27$      | $268 \pm 10$      | $1.22 \pm 0.11$   |
|          | H     | 4-Me  | $16.2 \pm 1.1$    | $15.4 \pm 0.8$    | $1.10 \pm 0.09$   |
|          | H     | H     | $20.0 \pm 0.8$    | $15.6 \pm 1.4$    | $1.28 \pm 0.13$   |
|          | H     | 4-Cl  | $37.4 \pm 0.9$    | $20.8 \pm 1.0$    | $1.80 \pm 0.10$   |
| <b>1</b> | 4-Cl  | 4-Me  | $3.00 \pm 0.30$   | $2.80 \pm 0.28$   | $1.07 \pm 0.15$   |
|          | 4-Cl  | H     | $3.60 \pm 0.56$   | $3.40 \pm 0.20$   | $1.10 \pm 0.18$   |
|          | 4-Cl  | 4-Cl  | $6.00 \pm 0.60$   | $4.80 \pm 0.23$   | $1.25 \pm 0.14$   |
|          | 4-MeO | 4-MeO | $16.7 \pm 0.8$    | $15.8 \pm 1.2$    | $1.06 \pm 0.10$   |
|          | 4-MeO | H     | $25.9 \pm 1.4$    | $22.7 \pm 2.1$    | $1.14 \pm 1.20$   |
|          | 4-MeO | 4-Cl  | $53.7 \pm 0.8$    | $42.2 \pm 0.1$    | $1.27 \pm 0.02$   |
|          | H     | 4-Me  | $2.53 \pm 0.11$   | $2.33 \pm 0.08$   | $1.09 \pm 0.04$   |
|          | H     | H     | $2.80 \pm 0.05$   | $2.51 \pm 0.10$   | $1.12 \pm 0.05$   |
|          | H     | 4-Cl  | $5.31 \pm 0.20$   | $4.54 \pm 0.34$   | $1.17 \pm 0.10$   |
| <b>2</b> | 4-Cl  | 4-Me  | $0.333 \pm 0.020$ | $0.308 \pm 0.020$ | $1.08 \pm 0.10$   |
|          | 4-Cl  | H     | $0.410 \pm 0.010$ | $0.370 \pm 0.030$ | $1.11 \pm 0.10$   |
|          | 4-Cl  | 4-Cl  | $1.35 \pm 0.10$   | $1.10 \pm 0.15$   | $1.23 \pm 0.20$   |

<sup>a</sup> Standard deviation.

**Table S2. Activation parameters<sup>a</sup> of the anilinolysis of (EtO)(YPhO)P(O)Cl (1), (EtO)(YPhO)P(S)Cl (2), (PhO)(YPhO)P(S)Cl (4), and (4-ClPhO)(YPhO)P(S)Cl (4') in acetonitrile at 55.0 °C**

|           | X     | Y     | $k_2 \times 10^4 / \text{M}^{-1} \text{s}^{-1}, (^\circ\text{C})$ | $\Delta H^\ddagger^c$ | $-\Delta S^\ddagger^d$ |
|-----------|-------|-------|-------------------------------------------------------------------|-----------------------|------------------------|
| <b>1</b>  | 4-MeO | H     | 159 (45.0), 182 (55.0), 216 (65.0)                                | $2.7 \pm 0.2^b$       | $58 \pm 1^b$           |
|           | 4-MeO | 4-Cl  | 285 (45.0), 328 (55.0), 363 (65.0)                                | $1.9 \pm 0.2$         | $60 \pm 1$             |
|           | 4-Me  | 4-Me  | 43.4 (45.0), 57.0 (55.0), 71.4 (65.0)                             | $4.7 \pm 0.2$         | $55 \pm 1$             |
|           | H     | H     | 13.8 (45.0), 20.0 (55.0), 27.6 (65.0)                             | $6.8 \pm 0.2$         | $51 \pm 1$             |
|           | H     | 4-Cl  | 25.6 (45.0), 37.4 (55.0), 54.8 (65.0)                             | $7.5 \pm 0.2$         | $47 \pm 1$             |
|           | 4-Cl  | 4-Cl  | 4.79 (45.0), 6.00 (55.0), 7.20 (65.0)                             | $3.7 \pm 0.2$         | $62 \pm 1$             |
|           | 3-Cl  | H     | 1.29 (45.0), 1.60 (55.0), 2.01 (65.0)                             | $4.1 \pm 0.2$         | $64 \pm 1$             |
| <b>2</b>  | 4-MeO | H     | 19.2 (45.0), 25.9 (55.0), 33.4 (65.0)                             | $5.0 \pm 0.4$         | $64 \pm 1$             |
|           | H     | H     | 2.17 (45.0), 2.80 (55.0), 3.78 (65.0)                             | $5.4 \pm 0.4$         | $59 \pm 1$             |
|           | 3-Cl  | H     | 0.226 (45.0), 0.240 (55.0), 0.377 (65.0)                          | $5.4 \pm 0.3$         | $54 \pm 1$             |
| <b>4</b>  | 4-MeO | 4-MeO | 6.40 (45.0), 7.61 (50.0), 9.20 (55.0)                             | $7.0 \pm 0.3$         | $52 \pm 1$             |
|           | 4-MeO | H     | 6.51 (45.0), 8.92 (50.0), 12.6 (55.0)                             | $13.0 \pm 0.3$        | $32 \pm 1$             |
|           | H     | H     | 0.690 (45.0), 0.823 (50.0), 1.01 (55.0)                           | $7.7 \pm 0.2$         | $54 \pm 1$             |
|           | 4-Me  | 4-Me  | 3.60 (45.0), 4.40 (55.0), 5.60 (65.0)                             | $4.2 \pm 0.2$         | $61 \pm 1$             |
|           | 4-Me  | 4-Cl  | 9.01 (45.0), 13.4 (55.0), 19.2 (65.0)                             | $7.7 \pm 0.2$         | $49 \pm 1$             |
| <b>4'</b> | H     | H     | 1.00 (45.0), 1.48 (55.0), 2.01 (65.0)                             | $6.9 \pm 0.4$         | $55 \pm 1$             |
|           | 3-Cl  | 4-Cl  | 0.0573 (45.0), 0.0954 (55.0), 0.164 (65.0)                        | $10.9 \pm 0.2$        | $48 \pm 1$             |

<sup>a</sup> Calculated by Eyring equation. <sup>b</sup> Standard deviation. <sup>c</sup> kcal mol<sup>-1</sup>. <sup>d</sup> cal mol<sup>-1</sup> K<sup>-1</sup>.

## Substrates

The substrates were prepared by the following one-step synthesis. ethyl dichlorophosphate (for **1**) and ethyl dichlorothiophosphate (for **2**) were treated with substituted phenols in the presence of triethylamine in methylene chloride for 2 h on ice. All the compounds were identified by TLC, IR, <sup>1</sup>H-NMR, <sup>13</sup>C-NMR, <sup>31</sup>P-NMR, GC-MS and elemental analysis. The physical constants after column chromatography (silica gel 60 (0.063-0.200 mm)/ethyl acetate + n-hexane) were as follows:

**Ethyl 4-methoxyphenyl chlorophosphate.** Yellowish Liquid; IR (neat) 3078 (C–H, aromatic), 2994 (CH<sub>3</sub>), 2912 (CH<sub>2</sub>), 1597, 1506, 1305, 1194 (P–O–C<sub>6</sub>H<sub>4</sub>), 1444 (CH<sub>3</sub>O), 835 (P=O); <sup>1</sup>H NMR (400 MHz, CDCl<sub>3</sub>) δ 7.17 (d, *J* = 8.4 Hz, 2H), 6.86 (d, *J* = 8.4 Hz, 2H), 4.37 (m, 2H, CH<sub>2</sub>), 3.78 (s, 3H, OCH<sub>3</sub>), 1.45 (m, 3H, CH<sub>3</sub>); <sup>13</sup>C NMR (100 MHz, CDCl<sub>3</sub>) δ 114.6, 114.7, 115.9, 121.2, 143.2, 157.4 (C=C, aromatic), 66.7 (CH<sub>2</sub>), 55.6 (OCH<sub>3</sub>), 15.8 (CH<sub>3</sub>); <sup>31</sup>P NMR (162 MHz, CDCl<sub>3</sub>) δ 5.68 (P=O, 1P, s); *m/z*, 250 (M<sup>+</sup>); Anal. Calcd. for C<sub>9</sub>H<sub>12</sub>O<sub>4</sub>PCl: C, 43.1; H, 4.8. Found: C, 43.2; H, 5.0.

**Ethyl 4-methylphenyl chlorophosphate.**<sup>1</sup> Yellowish Liquid; IR (neat) 3039 (C–H, aromatic), 2990 (CH<sub>3</sub>), 2926 (CH<sub>2</sub>), 1607, 1509, 1394 (P–O–C<sub>6</sub>H<sub>4</sub>), 823 (P=O); <sup>1</sup>H NMR (400 MHz, CDCl<sub>3</sub>) δ 7.12 (m, 4H, C<sub>6</sub>H<sub>4</sub>), 4.33–4.39 (m, 2H, CH<sub>2</sub>), 2.31 (s, 3H, CH<sub>3</sub>), 1.43 (m, 3H, CH<sub>3</sub>); <sup>13</sup>C NMR (100 MHz, CDCl<sub>3</sub>) δ 115.0, 119.9, 129.7, 130.2, 135.7, 147.4 (C=C, aromatic), 66.6 (CH<sub>2</sub>), 20.8 (CH<sub>3</sub>), 15.8 (CH<sub>3</sub>); <sup>31</sup>P NMR (162 MHz, CDCl<sub>3</sub>) δ 5.20 (P=O, 1P, s); *m/z*, 250 (M<sup>+</sup>); Anal. Calcd. for C<sub>9</sub>H<sub>12</sub>O<sub>3</sub>PCl: C, 46.1; H, 5.2. Found: C, 46.4; H, 5.5.

**Ethyl phenyl chlorophosphate.**<sup>1a,2</sup> Liquid, Colourless; IR (neat) 3077 (C–H, aromatic), 2989 (CH<sub>3</sub>), 2912 (CH<sub>2</sub>), 1593, 1193 (P–O–C<sub>6</sub>H<sub>4</sub>), 793 (P=O); <sup>1</sup>H NMR (400 MHz, CDCl<sub>3</sub>)  $\delta$  7.21–7.26 (m, 5H, C<sub>6</sub>H<sub>5</sub>), 4.39 (m, 2H, CH<sub>2</sub>), 1.38 (m, 3H, CH<sub>3</sub>); <sup>13</sup>C NMR (100 MHz, CDCl<sub>3</sub>)  $\delta$  119.9, 125.2, 129.7, 150.5 (C=C, aromatic), 65.5 (CH<sub>2</sub>), 16.1 (CH<sub>3</sub>); <sup>31</sup>P NMR (162 MHz, CDCl<sub>3</sub>)  $\delta$  –12.40 (P=O, 1P, s); m/z, 220 (M<sup>+</sup>); Anal. Calcd. for C<sub>8</sub>H<sub>10</sub>O<sub>3</sub>PCl: C, 43.6; H, 4.6. Found: C, 44.0; H, 4.7.

**Ethyl 3-methoxyphenyl chlorophosphate.**<sup>1b</sup> Yellowish Liquid; IR (neat) 3080 (C–H, aromatic), 2988 (CH<sub>3</sub>), 2912 (CH<sub>2</sub>), 1608, 1592, 1492, 1193 (P–O–C<sub>6</sub>H<sub>4</sub>), 1450 (CH<sub>3</sub>–O), 862 (P=O); <sup>1</sup>H NMR (400 MHz, CDCl<sub>3</sub>)  $\delta$  7.23 (m, 1H, C<sub>6</sub>H<sub>4</sub>), 6.85 (m, 1H, C<sub>6</sub>H<sub>4</sub>), 6.77 (m, 2H, C<sub>6</sub>H<sub>4</sub>), 4.37 (m, 2H, CH<sub>2</sub>), 3.77 (s, 3H, OCH<sub>3</sub>), 1.43 (m, 3H, CH<sub>3</sub>); <sup>13</sup>C NMR (100 MHz, CDCl<sub>3</sub>)  $\delta$  106.3, 111.8, 112.2, 130.1, 150.4, 160.6 (C=C, aromatic), 66.7 (CH<sub>2</sub>), 55.4 (OCH<sub>3</sub>), 15.7 (CH<sub>3</sub>); <sup>31</sup>P NMR (162 MHz, CDCl<sub>3</sub>)  $\delta$  4.76 (P=O, 1P, s); m/z, 250 (M<sup>+</sup>); Anal. Calcd. for C<sub>9</sub>H<sub>12</sub>O<sub>4</sub>PCl: C, 43.1; H, 4.8. Found: C, 43.1; H, 5.0.

**Ethyl 4-chlorophenyl chlorophosphate.**<sup>3</sup> Yellowish Liquid; IR (neat) 3100 (C–H, aromatic), 2988 (CH<sub>3</sub>), 2915 (CH<sub>2</sub>), 1589, 1488, 1302, 1199 (P–O–C<sub>6</sub>H<sub>4</sub>), 835 (P=O); <sup>1</sup>H NMR (400 MHz, CDCl<sub>3</sub>)  $\delta$  7.34 (m, 2H, C<sub>6</sub>H<sub>4</sub>), 7.19 (m, 2H, C<sub>6</sub>H<sub>4</sub>), 4.40 (m, 2H, CH<sub>2</sub>), 1.47 (m, 3H, CH<sub>3</sub>); <sup>13</sup>C NMR (100 MHz, CDCl<sub>3</sub>)  $\delta$  121.3, 129.7, 130.8, 148.8 (C=C, aromatic), 65.9 (CH<sub>2</sub>), 16.1 (CH<sub>3</sub>); <sup>31</sup>P NMR (162 MHz, CDCl<sub>3</sub>)  $\delta$  5.00 (P=O, 1P, s); m/z, 254 (M<sup>+</sup>); Anal. Calcd. for C<sub>8</sub>H<sub>9</sub>O<sub>3</sub>PCl<sub>2</sub>: C, 37.7; H, 3.6. Found: C, 38.0; H, 3.9.

**Ethyl 4-methoxyphenyl chlorothiophosphate.**<sup>4</sup> Liquid, Colourless; IR (neat) 3098 (C–H, aromatic), 2995 (CH<sub>3</sub>), 2910 (CH<sub>2</sub>), 1602, 1191 (P–O–C<sub>6</sub>H<sub>4</sub>), 1465 (CH<sub>3</sub>O), 816 (P=S); <sup>1</sup>H NMR (400 MHz, CDCl<sub>3</sub>)  $\delta$  7.16 (m, 2H, C<sub>6</sub>H<sub>4</sub>), 6.84–6.87 (m, 2H, C<sub>6</sub>H<sub>4</sub>), 4.38 (m, 2H, CH<sub>2</sub>), 3.77 (s, 3H, OCH<sub>3</sub>), 1.42–1.45 (m, 3H, CH<sub>3</sub>); <sup>13</sup>C NMR (100 MHz, CDCl<sub>3</sub>)  $\delta$  114.5, 122.0, 143.6, 157.4 (C=C, aromatic), 66.8 (CH<sub>2</sub>), 55.6 (OCH<sub>3</sub>), 15.7 (CH<sub>3</sub>); <sup>31</sup>P NMR (162 MHz, CDCl<sub>3</sub>)  $\delta$  70.37 (P=S, 1P, s); m/z, 266 (M<sup>+</sup>); Anal. Calcd. for C<sub>9</sub>H<sub>12</sub>O<sub>3</sub>PSCl: C, 40.5; H, 4.5; S, 12.0. Found: C, 40.7; H, 4.4; S, 11.9.

**Ethyl 4-methylphenyl chlorothiophosphate.**<sup>5</sup> Liquid, Colourless; IR (neat) 3037 (C–H, aromatic), 2989 (CH<sub>3</sub>), 2925 (CH<sub>2</sub>), 1602, 1195 (P–O–C<sub>6</sub>H<sub>4</sub>), 825 (P=S); <sup>1</sup>H NMR (400 MHz, CDCl<sub>3</sub>)  $\delta$  7.14–7.17 (m, 4H, C<sub>6</sub>H<sub>4</sub>), 4.38–4.44 (m, 2H, CH<sub>2</sub>), 2.34 (s, 3H, CH<sub>3</sub>), 1.45–1.48 (m, 3H, CH<sub>3</sub>); <sup>13</sup>C NMR (100 MHz, CDCl<sub>3</sub>)  $\delta$  120.8, 130.1, 135.9, 148.0 (C=C, aromatic), 66.8 (CH<sub>2</sub>), 20.9 (CH<sub>3</sub>), 15.7 (CH<sub>3</sub>); <sup>31</sup>P NMR (162 MHz, CDCl<sub>3</sub>)  $\delta$  69.64 (P=S, 1P, s); m/z, 250 (M<sup>+</sup>); Anal. Calcd. for C<sub>9</sub>H<sub>12</sub>O<sub>2</sub>PSCl: C, 43.1; H, 4.8; S, 12.8. Found: C, 43.5; H, 4.6; S, 12.7.

**Ethyl phenyl chlorothiophosphate.**<sup>6</sup> Liquid, Colourless; IR (neat) 3072 (C–H, aromatic), 2989 (CH<sub>3</sub>), 2908 (CH<sub>2</sub>), 1592, 1194 (P–O–C<sub>6</sub>H<sub>4</sub>), 814 (P=S); <sup>1</sup>H NMR (400 MHz, CDCl<sub>3</sub>)  $\delta$  7.34–7.36 (m, 2H, C<sub>6</sub>H<sub>5</sub>), 7.23–7.26 (m, 3H, C<sub>6</sub>H<sub>5</sub>), 4.38–4.42 (m, 2H, CH<sub>2</sub>), 1.42–1.46 (m, 3H, CH<sub>3</sub>); <sup>13</sup>C NMR (100 MHz, CDCl<sub>3</sub>)  $\delta$  121.1, 126.1, 129.6, 150.0 (C=C, aromatic), 66.8 (CH<sub>2</sub>), 15.7 (CH<sub>3</sub>); <sup>31</sup>P NMR (162 MHz, CDCl<sub>3</sub>)  $\delta$  69.09 (P=S, 1P, s); m/z, 236 (M<sup>+</sup>); Anal. Calcd. for C<sub>8</sub>H<sub>10</sub>O<sub>2</sub>PSCl: C, 40.6; H, 4.3; S, 13.6. Found: C, 41.0; H, 4.3; S, 14.0.

**Ethyl 4-chlorophenyl chlorothiophosphate.**<sup>4,5d</sup> Liquid, Colourless; IR (neat) 3097 (C–H, aromatic), 2989 (CH<sub>3</sub>), 2908 (CH<sub>2</sub>), 1590, 1162 (P–O–C<sub>6</sub>H<sub>4</sub>), 835 (P=S); <sup>1</sup>H NMR (400 MHz, CDCl<sub>3</sub>)  $\delta$  7.34–7.36 (m, 2H, C<sub>6</sub>H<sub>4</sub>), 7.21 (m, 2H, C<sub>6</sub>H<sub>4</sub>), 4.40–4.43 (m, 2H, CH<sub>2</sub>), 1.44–1.49 (m, 3H, CH<sub>3</sub>); <sup>13</sup>C NMR (100 MHz, CDCl<sub>3</sub>)  $\delta$  122.5, 122.6, 129.7 (C=C, aromatic), 67.0 (CH<sub>2</sub>), 15.7 (CH<sub>3</sub>); <sup>31</sup>P NMR (162 MHz, CDCl<sub>3</sub>)  $\delta$  69.10 (P=S, 1P, s); m/z, 270 (M<sup>+</sup>); Anal. Calcd. for C<sub>8</sub>H<sub>9</sub>O<sub>2</sub>PSCl<sub>2</sub>: C, 35.4; H, 3.4; S, 11.8. Found: C, 35.7; H, 3.4; S, 12.2.

**Ethyl 4-cyanophenyl chlorothiophosphate.**<sup>7</sup> White solid; mp 42–44 °C; IR (neat) 3102 (C–H, aromatic), 2992 (CH<sub>3</sub>), 2942 (CH<sub>2</sub>), 2234 (C≡N), 1600, 1212 (P–O–C<sub>6</sub>H<sub>4</sub>), 850 (P=S); <sup>1</sup>H NMR (400 MHz, CDCl<sub>3</sub>)  $\delta$  7.70–7.72 (m, 2H, C<sub>6</sub>H<sub>4</sub>), 7.38–7.41 (m, 2H, C<sub>6</sub>H<sub>4</sub>), 4.38 (m, 2H, CH<sub>2</sub>), 1.46–1.50 (m, 3H, CH<sub>3</sub>); <sup>13</sup>C NMR (100 MHz, CDCl<sub>3</sub>)  $\delta$  117.8, 122.2, 133.9, 153.0 (C=C, aromatic), 110.2 (4-CN), 67.4 (CH<sub>2</sub>), 15.7 (CH<sub>3</sub>); <sup>31</sup>P NMR (162 MHz, CDCl<sub>3</sub>)  $\delta$  67.60 (P=S, 1P, s); m/z, 261 (M<sup>+</sup>); Anal. Calcd. for C<sub>9</sub>H<sub>9</sub>O<sub>2</sub>NPSCl: C, 41.3; H, 3.5; N, 5.4; S, 12.3. Found: C, 40.9; H, 3.5; N, 5.3; S, 12.7.

**Product analysis.** Ethyl 4-methylphenyl chlorophosphate was treated with excess aniline (for **1**) and ethyl 4-chlorophenyl chlorothiophosphate was treated with excess 4-methylaniline, for more than 15 half-lives at 55.0 °C in acetonitrile. The physical constants after column chromatography (silica gel/ethyl acetate + n-hexane) were:

**(CH<sub>3</sub>-CH<sub>2</sub>O)(4-CH<sub>3</sub>-C<sub>6</sub>H<sub>4</sub>O)P(=O)NH-C<sub>6</sub>H<sub>5</sub>.**<sup>8</sup> Yellowish Liquid; IR (neat) 3173 (NH), 3094 (C-H, aromatic), 2986 (CH<sub>3</sub>), 2912 (CH<sub>2</sub>), 1605, 1504, 1166 (P-O-C<sub>6</sub>H<sub>4</sub>), 826 (P=O); <sup>1</sup>H NMR (400 MHz, CDCl<sub>3</sub>)  $\delta$  7.49 (m, 2H, C<sub>6</sub>H<sub>4</sub>), 7.26 (m, 7H, Ar), 6.46 (d, *J* = 9.6 Hz, 1H, NH), 4.38–4.51 (m, 2H, CH<sub>2</sub>), 2.49 (s, 3H, CH<sub>3</sub>), 1.57 (m, 3H, CH<sub>3</sub>); <sup>13</sup>C NMR (100 MHz, CDCl<sub>3</sub>)  $\delta$  117.6, 120.1, 129.2, 129.9, 134.5, 139.2, 148.0 (C=C, aromatic), 63.4 (CH<sub>2</sub>), 20.8 (CH<sub>3</sub>), 16.2 (CH<sub>3</sub>); <sup>31</sup>P NMR (162 MHz, CDCl<sub>3</sub>)  $\delta$  3.39 (d, *J* = 8.0 Hz, 1P, P=O); *m/z*, 291 (M<sup>+</sup>); Anal. Calcd. for C<sub>15</sub>H<sub>18</sub>NO<sub>3</sub>P: C, 61.9; H, 6.2; N, 4.8. Found: C, 61.5; H, 6.5; N, 5.1.

**(CH<sub>3</sub>-CH<sub>2</sub>O)(4-Cl-C<sub>6</sub>H<sub>4</sub>O)P(=S)NH-(4-CH<sub>3</sub>-C<sub>6</sub>H<sub>4</sub>).** Brownish Liquid; IR (neat) 3269 (NH), 3030 (C-H, aromatic), 2985 (CH<sub>3</sub>), 2920 (CH<sub>2</sub>), 1617, 1515, 1163 (P-O-C<sub>6</sub>H<sub>4</sub>), 814 (P=S); <sup>1</sup>H NMR (400 MHz, CDCl<sub>3</sub>)  $\delta$  7.25 (m, 2H, C<sub>6</sub>H<sub>4</sub>), 7.06–7.11 (m, 4H, C<sub>6</sub>H<sub>4</sub>), 6.97 (m, 2H, C<sub>6</sub>H<sub>4</sub>), 5.38 (d, *J* = 16.0 Hz, 1H, NH), 4.15–4.32 (m, 2H, CH<sub>2</sub>), 2.31 (s, 3H, CH<sub>3</sub>), 1.38 (m, 3H, CH<sub>3</sub>); <sup>13</sup>C NMR (100 MHz, CDCl<sub>3</sub>)  $\delta$  118.0, 122.7, 129.4, 129.9, 130.6, 132.2, 136.3, 148.8 (C=C, aromatic), 64.0 (CH<sub>2</sub>), 20.7 (CH<sub>3</sub>), 15.8 (CH<sub>3</sub>); <sup>31</sup>P NMR (162 MHz, CDCl<sub>3</sub>)  $\delta$  67.0 (s, 1P, P=S); *m/z*, 341 (M<sup>+</sup>); Anal. Calcd. for C<sub>15</sub>H<sub>17</sub>NO<sub>2</sub>PSCl: C, 52.7; H, 5.0; N, 4.1, S, 9.4. Found: C, 52.8; H, 5.2; N, 4.5, S, 9.0.



## References

- (1) (a) F. L. Maklyayev, M. I. Druzin, I. V. Palagina, R. Va. Aleksandrova, V. K. Prokhdotseva and R. A. Khamidulina, *Zhurnal Obshch. Khimii*, 1962, **32**, 3421; (b) L-N. He, B. Feng, T-B. Huang, Q-C. Zhou and J-L. Zhang, *Phosphorus, Sulfur and Silicon and the Related Elements*, 1999, **148**, 51; (c) S. -H. Wang, G. -Z. Tang and X. -D. Xing, *Gaodeng Xuexiao Huaxue Xuebao*, 2000, **21**, 1506.
- (2) M. Adler, J. D. Nicholson, D. F. Starks, C. T. Kane, F. Cornille and B. E. Hackley, *J. Applied Toxicology*, 1999, **19**, S5.
- (3) I. N. Nagayuk, V. I. Lomakina and Y. A. Mandel'baum, *Zhurnal Obshch. Khimii*, 1975, **45**, 2159.
- (4) R. Chen, H. Yang, Q. Zeng, Y. Zhang, M. Yue, X. Sun, L. Wang, H. Tan and M. Cheng, *Huaxue Xuebao*, 1981, **39**, 643.
- (5) (a) B-A. Song, D-Y. Hu, S. Zeng, R-M. Huang, S. Yang and J. Huang, *Youji Huaxue*, 2001, **21**, 524; (b) G. Jin, Y. Li, Z. Liu and J. Zheng, *Yingyong Huaxue*, 1997, **14**, 5; (c) R. Chen, H. Yang, Q. Zeng, Y. Zhang, M. Yue, X. Sun, L. Wang, H. Tan and M. Cheng, *Hauxue Xuebao*, 1981, **39**, 643; (d) R. Chen, H. Wang, R. Cao, Z. Zhang, J. Shao, L. Zhu, X. Chen and H. Yang, *Gaodeng Xuexiao Hauxue Xuebao*, 1987, **8**, 706.
- (6) (a) F. Xu, H. Yang, B. Chen and H. Liu, *Nongyao*, 2000, **39**, 10; (b) G-Y. Jin, M-Y. Xie, G-F. Zhao and Z-F. Liu, *Gaodeng Xuexiao Hauxue Xuebao*, 1995, **16**, 1241.

(7) Sidney B. Richter, (*Velsicol Chemical Corp.*). *U. S.*, 1967, 7 pp.

(8) N. K. Bliznyuk, P. S. Khokhlov, R. V. Strel'tsov and G. V. Dotsev, *Zhur. Obsh. Khim.*, 1967, **37**, 1122.

**Reactant - Ethyl phenyl chlorophosphate (1) (gas-phase)**

N-N= 1.037283355046D+03 E-N=-5.234139730459D+03 KE= 1.334660676058D+03  
1\1\GINC-GOM6\_1\FOpt\RB3LYP\6-311+G(d,p)\C8H10Cl1O3P1\GAUSS\02-Feb-200  
7\1\# B3LYP/6-311+G(d,p) opt=(z-matrix) optcyc=100 # freq=noraman\PO  
-BACK-FULL\0,1\PO,1,op2\Cl,1,clp3,2,clpo3\O,1,op4,2,opo4,3,dih4,0\O,  
1,op5,2,opo5,3,dih5,0\C,4,co6,1,cop6,2,dih6,0\C,6,cc7,4,cco7,1,dih7,0\  
C,7,cc8,6,ccc8,4,dih8,0\C,8,cc9,7,ccc9,6,dih9,0\C,9,cc10,8,ccc10,7,dih  
10,0\C,10,cc11,9,ccc11,8,dih11,0\H,7,hc12,6,hcc12,8,dih12,0\H,8,hc13,7  
,hcc13,9,dih13,0\H,9,hc14,8,hcc14,10,dih14,0\H,10,hc15,9,hcc15,8,dih15  
,0\H,11,hc16,10,hcc16,9,dih16,0\C,2,co17,1,cop17,3,dih17,0\C,17,cc18,2  
,cco18,1,dih18,0\H,17,hc19,2,hco19,18,dih19,0\H,17,hc20,2,hco20,18,dih  
20,0\H,18,hc21,17,hcc21,2,dih21,0\H,18,hc22,17,hcc22,21,dih22,0\H,18,h  
c23,17,hcc23,21,dih23,0\op2=1.58805421\clp3=2.04304443\clpo3=100.9152  
5222\op4=1.61429931\opo4=101.24322661\dih4=-107.1337549\op5=1.4734841\  
opo5=118.08093014\dih5=125.05448989\co6=1.40303125\cop6=125.90168126\d  
ih6=179.83887708\cc7=1.38997158\cco7=116.28611854\dih7=226.27763443\cc  
8=1.39269798\ccc8=118.98346599\dih8=182.96596845\cc9=1.39435651\ccc9=1  
20.25965781\dih9=-0.25369613\cc10=1.39368978\ccc10=119.78476119\dih10=  
0.15575389\cc11=1.39444234\ccc11=120.7026201\dih11=0.16118915\hc12=1.0  
8279644\hcc12=119.32953593\dih12=179.8271833\hc13=1.08388625\hcc13=119  
.51594855\dih13=180.17358722\hc14=1.08368425\hcc14=120.1097375\dih14=1  
79.98987177\hc15=1.0839165\hcc15=120.10870309\dih15=179.968294\hc16=1.  
08209722\hcc16=121.42519487\dih16=180.19365693\co17=1.46452386\cop17=1  
20.93176296\dih17=190.5255768\cc18=1.51260256\cco18=107.4566855\dih18=  
167.17588805\hc19=1.09274114\hco19=107.79224722\dih19=120.5812591\hc20  
=1.09184766\hco20=108.42220459\dih20=238.73991556\hc21=1.09357062\hcc2  
1=109.39307924\dih21=179.10972734\hc22=1.09160819\hcc22=110.80273471\d  
ih22=119.58612034\hc23=1.09171263\hcc23=110.86403592\dih23=240.4522533  
6\Version=IA32L-G03RevD.02\State=1-A\HF=-1338.3813309\RMSD=6.663e-09\  
RMSF=3.822e-05\Thermal=0.\Dipole=-0.5190389,0.8235936,0.5306036\PG=C01  
[X(C8H10Cl1O3P1)]\@

**Reactant - Ethyl phenyl chlorothiophosphate (2) (gas-phase)**

N-N= 1.147250253658D+03 E-N=-6.223269369153D+03 KE=  
1.657282898454D+031\1\GINC-GOM6\_1\FOpt\RB3LYP\6-  
311+G(d,p)\C8H10Cl1O2P1S1\GAUSS\05-Feb-2 007\1\#\ B3LYP/6-311+G(d,p) opt=z-matrix  
freq=norman optcyc=200\PO-B  
ACK-FULL\0,1\PO,1,op2\Cl,1,clp3,2,clpo3\O,1,op4,2,opo4,3,dih4,0\S,1,  
sp5,2,opo5,3,dih5,0\C,4,co6,1,cop6,2,dih6,0\C,6,cc7,4,cco7,1,dih7,0\C,  
7,cc8,6,ccc8,4,dih8,0\C,8,cc9,7,ccc9,6,dih9,0\C,9,cc10,8,ccc10,7,dih10  
,0\C,10,cc11,9,ccc11,8,dih11,0\H,7,hc12,6,hcc12,8,dih12,0\H,8,hc13,7,h  
cc13,9,dih13,0\H,9,hc14,8,hcc14,10,dih14,0\H,10,hc15,9,hcc15,8,dih15,0  
\H,11,hc16,10,hcc16,9,dih16,0\C,2,co17,1,cop17,3,dih17,0\C,17,cc18,2,c  
co18,1,dih18,0\H,17,hc19,2,hco19,18,dih19,0\H,17,hc20,2,hco20,18,dih20  
,0\H,18,hc21,17,hcc21,2,dih21,0\H,18,hc22,17,hcc22,21,dih22,0\H,18,hc2  
3,17,hcc23,21,dih23,0\op2=1.59645516\clp3=2.06330856\clpo3=98.8181504  
7\op4=1.6258663\opo4=99.9173564\dih4=-105.38747635\sp5=1.92599696\opo5  
118.98796882\dih5=125.47438385\co6=1.40081259\cop6=126.17473246\dih6=  
179.81939924\cc7=1.39004586\cco7=118.16165107\dih7=257.33020292\cc8=1.  
9331856\ccc8=118.85515154\dih8=183.52473009\cc9=1.39425663\ccc9=120.3  
327389\dih9=0.13207854\cc10=1.39408152\ccc10=119.89956121\dih10=0.103  
88901\cc11=1.39361386\ccc11=120.42261615\dih11=-  
0.07620007\hc12=1.08261609\hcc12=119.59063194\dih12=179.78696613\hc13=1.08385596\hc  
c13=119.5095396\dih13=179.81621678\hc14=1.08372641\hcc14=120.0492187\dih14=179.833  
07897\hc15=1.08384927\hcc15=120.15383591\dih15=179.81960459\hc16=1.08196613\hcc16=  
121.41607857\dih16=180.10134874\co17=1.46061648\cop17=122.19793932\dih17=183.40146  
26\cc18=1.51298275\cco18=107.36368023\dih18=171.24678448\hc19=1.09271639\hco19=107.  
93439403\dih19=120.67730404\hc20=1.092421\hco20=108.46373486\dih20=238.9116452\hc2  
1=1.09357082\hcc21=109.36020471\dih21=179.41335017\hc22=1.09161119\hcc22=110.79052  
886\dih22=119.55986876\hc23=1.09168495\hcc23=110.9014693\dih23=240.43515724\Version  
=IA32L-G03RevD.0\State=1-A\HF=-1661.3390485\RMSD=2.496e-09\RM SF=7.680e-  
05\Thermal=0.\Dipole=-0.6068972,0.8497042,0.417119\PG=C01 [X (C8H10Cl1O2P1S1)]\@

**Reactant - 4-Nitrophenyl diphenylphosphinate (5) (gas-phase)**

N-N= 2.080625494124D+03 E-N=-7.421693545515D+03 KE= 1.386859546989D+03  
1\1\GINC-GOM2\_10\FOpt\RB3LYP\6-311+G(d,p)\C18H14N1O4P1\GAUSS\24-May-20  
07\0\# B3LYP/6-311+G(d,p) opt optcyc=200 freq=noraman\### 2-ph-oph-n  
o2-rea ###\0,1\C,-0.0008363444,-0.0036326104,0.0005362944\C,0.0024384  
262,0.0004558415,1.3997028377\C,1.2198585805,0.008222337,2.0928116477\  
C,2.4208504041,0.0048211159,1.3903738844\C,2.4136541635,-0.0034738042,  
-0.0051575041\C,1.2050471269,-0.0069779617,-0.6981269903\P,-1.60441029  
32,0.0092485934,2.2528739554\O,-1.4987408597,-1.2632270636,3.312962409  
9\C,-1.6667118446,1.3679779746,3.4485502451\C,-1.1220093077,1.28957983  
96,4.7359476097\C,-1.189798556,2.390051936,5.5865944877\C,-1.798646812  
5,3.5694739495,5.1591468809\C,-2.3495806462,3.6475137239,3.8811646352\  
C,-2.2880842984,2.5499067574,3.0264927305\O,-2.7451001968,-0.027121012  
2,1.2959440288\H,-0.6696532826,0.3678478059,5.0793201078\H,-0.77405900  
34,2.3241544197,6.5855940745\H,-1.8504723009,4.4237574656,5.8246909308  
\H,-2.8349022937,4.5590916467,3.5519847191\H,-2.7344920811,2.597747512  
1,2.0400301085\H,1.2343172415,0.0212602474,3.1767024196\H,3.3615169433  
,0.0099692862,1.9290947788\H,3.351012386,-0.0057196079,-0.5500057807\H  
,1.1993284354,-0.0122969594,-1.7820760089\H,-0.9481397763,-0.004635736  
5,-0.5253187072\C,-1.5021818417,-2.5966693734,2.9666022888\C,-0.670530  
3818,-3.4392950004,3.7078526445\C,-0.6593723779,-4.8010392707,3.445979  
7037\C,-1.4829052901,-5.2997045942,2.4397089984\C,-2.3176930893,-4.468  
5524255,1.6986774726\C,-2.3352862939,-3.1054579201,1.9656648757\H,-0.0  
437315079,-3.0165036406,4.4825322405\H,-0.0254829694,-5.4768043702,4.0  
030512788\N,-1.4689864594,-6.7447927886,2.1538230312\H,-2.9482239701,-  
4.8934763758,0.9299348461\H,-2.9822608237,-2.4370289102,1.4130808803\O  
, -2.1976724758,-7.1571899232,1.2588047901\O,-0.7278889262,-7.452558599  
9,2.8273793512\Version=IA32L-G03RevD.02\State=1-A\HF=-1391.6064034\RM  
SD=1.852e-09\RMSF=2.004e-05\Thermal=0.\Dipole=1.4117619,2.6665272,0.80  
07091\PG=C01 [X(C18H14N1O4P1)]\@

**Reactant - 4-Nitrophenyl methylphenylphosphinate (6) (gas-phase)**

N-N= 1.478497787190D+03 E-N=-5.772514064087D+03 KE= 1.195939703971D+03  
1\1\GINC-GOM6\_1\FOpt\RB3LYP\6-311+G(d,p)\C13H12N1O4P1\GAUSS\22-May-200  
7\1\# b3lyp/6-311+G(d,p) opt=z-matrix optcyc=200 # freq=noraman geom=  
check guess=check\-- ph-po-me-phno2 --\0,1\PC,1,cp2\O,1,op3,2,opc3\  
C,1,cp4,2,cpc4,3,dih4,0\O,1,op5,2,opc5,3,dih5,0\C,2,cc6,1,ccp6,3,dih6,  
0\C,6,cc7,2,ccc7,1,dih7,0\C,7,cc8,6,ccc8,2,dih8,0\C,8,cc9,7,ccc9,6,dih  
9,0\C,9,cc10,8,ccc10,7,dih10,0\H,6,hc11,2,hcc11,7,dih11,0\H,7,hc12,6,h  
cc12,8,dih12,0\H,8,hc13,7,hcc13,9,dih13,0\H,9,hc14,8,hcc14,7,dih14,0\H  
,10,hc15,9,hcc15,8,dih15,0\H,4,hc16,1,hcp16,2,dih16,0\H,4,hc17,1,hcp17  
,16,dih17,0\H,4,hc18,1,hcp18,16,dih18,0\C,3,co19,1,cop19,5,dih19,0\C,1  
9,cc20,3,cco20,1,dih20,0\C,20,cc21,19,ccc21,3,dih21,0\C,21,cc22,20,ccc  
22,19,dih22,0\C,22,cc23,21,ccc23,20,dih23,0\C,23,cc24,22,ccc24,21,dih2  
4,0\H,20,hc25,19,hcc25,21,dih25,0\H,21,hc26,20,hcc26,22,dih26,0\N,22,n  
c27,21,ncc27,23,dih27,0\H,23,hc28,22,hcc28,21,dih28,0\H,24,hc29,23,hcc  
29,22,dih29,0\O,27,on30,22,onc30,21,dih30,0\O,27,on31,30,ono31,22,dih3  
1,0\cp2=1.80968537\op3=1.66278173\opc3=99.65999806\cp4=1.81796268\cpc  
4=108.93707064\dih4=-107.16419607\op5=1.48849351\opc5=114.37396384\dih  
5=124.01025146\cc6=1.39892458\ccp6=117.39224115\dih6=226.63758092\cc7=  
1.39359899\ccc7=119.85636611\dih7=181.31321409\cc8=1.39322287\ccc8=120  
.08162602\dih8=-0.07927515\cc9=1.39555751\ccc9=120.1670205\dih9=-0.083  
44387\cc10=1.39148713\ccc10=120.02400533\dih10=0.15121216\hc11=1.08377  
824\hcc11=119.29850084\dih11=180.53560183\hc12=1.08389999\hcc12=119.77  
718582\dih12=180.26109686\hc13=1.08418661\hcc13=119.96304568\dih13=180  
.1872313\hc14=1.08396261\hcc14=120.11322139\dih14=180.43687415\hc15=1.  
08403401\hcc15=119.70360389\dih15=180.93342576\hc16=1.09183949\hcp16=1  
09.00885147\dih16=171.74512525\hc17=1.0913289\hcp17=108.373285\dih17=1  
18.24354391\hc18=1.09101564\hcp18=111.4061026\dih18=238.85898205\co19=  
1.37558211\cop19=126.39023993\dih19=50.9976034\cc20=1.39824544\cco20=1  
16.20670372\dih20=150.36964909\cc21=1.38618967\ccc21=119.8751643\dih21  
=178.45675172\cc22=1.39307765\ccc22=118.93940642\dih22=0.14845297\cc23  
=1.39143694\ccc23=121.63233944\dih23=-0.46738314\cc24=1.38954775\ccc24  
=119.51668517\dih24=0.10555041\hc25=1.08255896\hcc25=119.11947778\dih2  
5=180.29180912\hc26=1.08115396\hcc26=121.37536984\dih26=179.84253877\n  
c27=1.47277576\ncc27=119.10285209\dih27=180.17641533\hc28=1.08131128\h  
cc28=119.5783755\dih28=180.63391878\hc29=1.08217912\hcc29=120.90605011  
\dih29=181.17813781\on30=1.22563001\onc30=117.78971923\dih30=180.16604  
373\on31=1.22630489\ono31=124.49978182\dih31=180.08165871\Version=IA3  
2L-G03RevD.02\State=1-A\HF=-1199.8299133\RMSD=7.126e-09\RMSF=2.708e-05  
\Thermal=0.\Dipole=-0.9244963,1.3293022,2.711793\PG=C01 [X(C13H12N1O4P  
1)]\@

## Reactant - 4-Nitrophenyl dimethylphosphinate (7) (gas-phase)

N-N= 9.968329823284D+02 E-N=-4.364494510914D+03 KE= 1.005017513639D+03  
1\1\GINC-GOM6\_9\FOpt\RB3LYP\6-311+G(d,p)\C8H10N1O4P1\GAUSS\20-May-2007  
1\1\# b3lyp/6-311+G(d,p) opt=z-matrix optcyc=200 # freq=noraman geom=c  
heck guess=check\-- 2me-po-phno2 --\0,1\P\C,1,cp2\O,1,op3,2,opc3\C,1  
,cp4,2,cpc4,3,dih4,0\O,1,op5,2,opc5,3,dih5,0\H,2,hc6,1,hcp6,3,dih6,0\H  
,2,hc7,1,hcp7,6,dih7,0\H,2,hc8,1,hcp8,6,dih8,0\H,4,hc9,1,hcp9,2,dih9,0  
\H,4,hc10,1,hcp10,9,dih10,0\H,4,hc11,1,hcp11,9,dih11,0\C,3,co12,1,cop1  
2,2,dih12,0\C,12,cc13,3,cco13,1,dih13,0\C,13,cc14,12,ccc14,3,dih14,0\C  
,14,cc15,13,ccc15,12,dih15,0\C,15,cc16,14,ccc16,13,dih16,0\C,16,cc17,1  
5,ccc17,14,dih17,0\H,13,hc18,12,hcc18,14,dih18,0\H,14,hc19,13,hcc19,15  
,dih19,0\N,15,nc20,14,ncc20,16,dih20,0\H,16,hc21,15,hcc21,14,dih21,0\H  
,17,hc22,16,hcc22,15,dih22,0\O,20,on23,15,onc23,14,dih23,0\O,20,on24,2  
3,ono24,15,dih24,0\cp2=1.80926527\op3=1.66331166\opc3=98.37308854\cp4  
=1.81792837\cpc4=108.50774184\dih4=-107.10494814\op5=1.4877565\opc5=11  
5.73415053\dih5=123.36434902\hc6=1.09169115\hpc6=108.66715153\dih6=174  
.2059151\hc7=1.09097655\hpc7=108.4022979\dih7=118.10733231\hc8=1.09072  
771\hpc8=111.44877662\dih8=238.77887027\hc9=1.09159379\hpc9=108.809072  
35\dih9=171.07131646\hc10=1.09173329\hpc10=108.789816\dih10=117.845736  
55\hc11=1.09128745\hpc11=111.52262225\dih11=239.080856\co12=1.37618688  
\cop12=126.6800926\dih12=172.36892882\cc13=1.39803342\cco13=116.174675  
69\dih13=148.98548214\cc14=1.38634695\ccc14=119.85381031\dih14=178.335  
58467\cc15=1.39299302\ccc15=118.9287931\dih15=0.21858976\cc16=1.391447  
54\ccc16=121.65167667\dih16=-0.40098506\cc17=1.38965114\ccc17=119.5105  
3632\dih17=0.06044135\hc18=1.0825921\hcc18=119.11247939\dih18=180.2899  
9751\hc19=1.08114209\hcc19=121.38965612\dih19=179.79300966\nc20=1.4731  
6012\ncc20=119.09184388\dih20=180.10950036\hc21=1.08129324\hcc21=119.5  
8991385\dih21=180.55255147\hc22=1.08203582\hcc22=120.97998067\dih22=18  
0.95415938\on23=1.22555215\onc23=117.7747698\dih23=180.11145777\on24=1  
.22624554\ono24=124.52318125\dih24=180.07733688\Version=IA32L-G03RevD  
.02\State=1-A\HF=-1008.053353\RMSD=1.763e-09\RMSF=2.949e-05\Thermal=0.  
\Dipole=-0.9445544,1.4575176,2.3645589\PG=C01 [X(C8H10N1O4P1)]\@

**Table S3. Rotation barriers for  $\angle 1234$  in kcal mol<sup>-1</sup> (calculated at the RHF/6-31G\* level)**

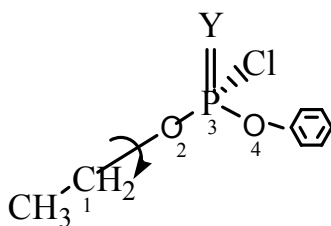

| Y                                          | O   | S   |
|--------------------------------------------|-----|-----|
| Relative Torsional Angle ( $\angle 1234$ ) |     |     |
| 0 <sup>oa</sup>                            | 0.0 | 0.0 |
| 30°                                        | 0.1 | 0.5 |
| 60°                                        | 0.2 | 0.6 |
| 90°                                        | 0.4 | 0.2 |
| 120°                                       | 1.2 | 0.3 |
| 150°                                       | 3.1 | 2.6 |
| 180°                                       | 3.0 | 3.4 |
| 210°                                       | 1.1 | 1.9 |
| 240°                                       | 0.3 | 0.4 |
| 270°                                       | 1.4 | 1.1 |
| 300°                                       | 1.7 | 1.8 |
| 330°                                       | 0.7 | 0.8 |

<sup>a</sup> Real torsional angle is 109.5° in the optimized structure.



**Table S4. Rotation barriers for  $\angle 1234$  in kcal mol<sup>-1</sup><sup>a</sup> (calculated at the RHF/6-31G\* level)**

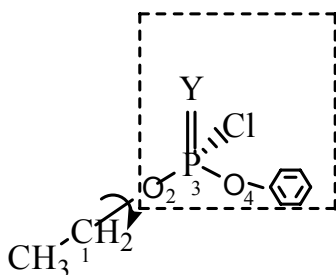

| Y                                          | O   | S   |
|--------------------------------------------|-----|-----|
| Relative Torsional Angle ( $\angle 1234$ ) |     |     |
| 0 <sup>ob</sup>                            | 0.0 | 0.0 |
| 30°                                        | 0.6 | 1.1 |
| 60°                                        | 0.4 | 1.2 |
| 90°                                        | 0.3 | 0.3 |
| 120°                                       | 2.7 | 1.1 |
| 150°                                       | 6.2 | 4.5 |
| 180°                                       | 5.5 | 5.6 |
| 210°                                       | 2.4 | 3.1 |
| 240°                                       | 1.7 | 1.2 |
| 270°                                       | 3.0 | 2.1 |
| 300°                                       | 2.7 | 2.6 |
| 330°                                       | 1.1 | 1.2 |

<sup>a</sup> All geometrical parameters in dashed area are fixed at equilibrium geometries. <sup>b</sup> Real torsional angle is 109.5° in the optimized structure.

**Table S5. Rotation barriers for  $\angle 1234$  in kcal mol<sup>-1</sup><sup>a</sup> (calculated at the RHF/6-31G\* level)**

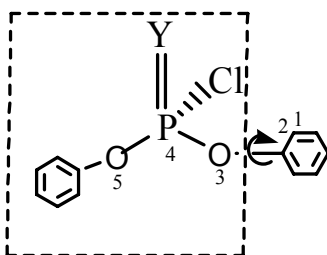

| Y                                          | O    | S    |
|--------------------------------------------|------|------|
| Relative Torsional Angle ( $\angle 1234$ ) |      |      |
| 0° <sup>b</sup>                            | 0.0  | 0.0  |
| 30°                                        | 0.6  | 1.0  |
| 60°                                        | 2.6  | 5.0  |
| 90°                                        | 4.4  | 11.3 |
| 120°                                       | 8.5  | 28.0 |
| 150°                                       | 18.8 | 45.4 |
| 180°                                       | 16.1 | 23.9 |
| 210°                                       | 8.2  | 8.9  |
| 240°                                       | 10.3 | 5.2  |
| 270°                                       | 6.1  | 5.0  |
| 300°                                       | 5.3  | 3.2  |
| 330°                                       | 2.0  | 0.7  |

<sup>a</sup> All geometrical parameters in dashed area are fixed at equilibrium geometries. <sup>b</sup> Real torsional angle is 231.1° in the optimized structure.

**Table S6. Rotation barriers for  $\angle 2345$  in kcal mol<sup>-1</sup> (calculated at the RHF/6-31G\* level)**

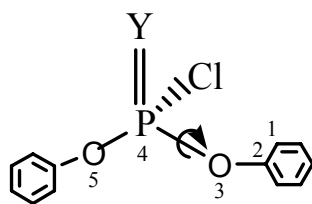

| Y                                          | O   | S   |
|--------------------------------------------|-----|-----|
| Relative Torsional Angle ( $\angle 2345$ ) |     |     |
| 0° <sup>a</sup>                            | 0.0 | 0.0 |
| 60°                                        | 1.8 | 1.6 |
| 120°                                       | 0.2 | 0.2 |
| 180°                                       | 2.0 | 2.0 |
| 240°                                       | 0.7 | 2.1 |
| 300°                                       | 2.9 | 3.0 |

<sup>a</sup> Real torsional angle is 183.2° in the optimized structure.

**Table S7. Rotation barriers for  $\angle 2345$  in kcal mol<sup>-1a</sup> (calculated at the RHF/6-31G\* level)**

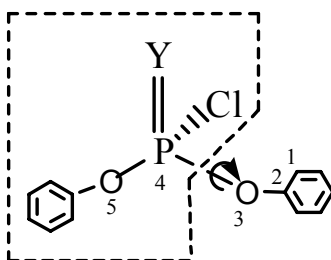

| Y                                         | O   | S   |
|-------------------------------------------|-----|-----|
| Relative Torsional Angle( $\angle 2345$ ) |     |     |
| 0 <sup>ob</sup>                           | 0.0 | 0.0 |
| 30°                                       | 0.5 | 1.2 |
| 60°                                       | 1.2 | 2.2 |
| 90°                                       | 1.3 | 2.2 |
| 120°                                      | 0.9 | 1.6 |
| 150°                                      | 0.2 | 0.4 |
| 180°                                      | 0.4 | 0.9 |
| 210°                                      | 0.4 | 1.6 |
| 240°                                      | 1.2 | 2.2 |
| 270°                                      | 1.3 | 2.2 |
| 300°                                      | 0.9 | 1.5 |
| 330°                                      | 0.1 | 1.6 |

<sup>a</sup> All geometrical parameters in dashed area are fixed at equilibrium geometries. <sup>b</sup> Real torsional angle is 183.2° in the optimized structure.

**Table S8. Bond angles of 1, 2, 3, and 4 (calculated at the B3LYP/6-311+G(d,p) level)**

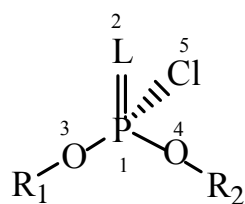

| substrate | L | R <sub>1</sub> | R <sub>2</sub> | ∠213  | ∠214  | ∠215  | ∠314  | ∠415  | ∠315  |
|-----------|---|----------------|----------------|-------|-------|-------|-------|-------|-------|
| <b>1</b>  | O | Et             | Ph             | 118.1 | 116.0 | 114.1 | 101.2 | 104.3 | 100.9 |
| <b>2</b>  | S | Et             | Ph             | 119.0 | 117.4 | 115.3 | 99.9  | 103.4 | 98.8  |
| <b>3</b>  | O | Ph             | Ph             | 118.5 | 116.7 | 113.9 | 100.7 | 104.8 | 99.8  |
| <b>4</b>  | S | Ph             | Ph             | 119.4 | 117.9 | 115.8 | 99.4  | 103.4 | 97.5  |

**Table S9. Bond angles of 5, 6, and 7 (calculated at the B3LYP/6-311+G(d,p) level)**

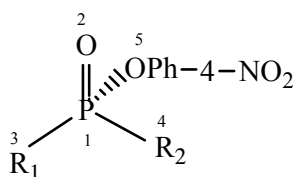

| substrate | R <sub>1</sub> | R <sub>2</sub> | ∠213  | ∠214  | ∠215  | ∠314  | ∠415  | ∠315 |
|-----------|----------------|----------------|-------|-------|-------|-------|-------|------|
| <b>5</b>  | Ph             | Ph             | 114.6 | 112.0 | 116.1 | 110.1 | 103.9 | 99.0 |
| <b>6</b>  | Ph             | Me             | 114.4 | 114.0 | 115.7 | 108.9 | 120.8 | 99.7 |
| <b>7</b>  | Me             | Me             | 115.7 | 113.9 | 115.3 | 108.5 | 103.3 | 98.4 |

**Table S10. Bond angles of **9f** and **10f** in acetonitrile (calculated at the CPCM–MP2/6–31+G\* level)**

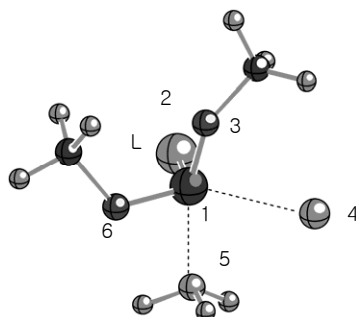

|            |   |              |              |              |              |              |              |              |              |              |
|------------|---|--------------|--------------|--------------|--------------|--------------|--------------|--------------|--------------|--------------|
| substrate  | L | $\angle 216$ | $\angle 214$ | $\angle 614$ | $\angle 312$ | $\angle 314$ | $\angle 316$ | $\angle 512$ | $\angle 514$ | $\angle 516$ |
| position   |   | e,e          | e,e          | e,e          | a,e          | a,e          | a,e          | a,e          | a,e          | a,e          |
| <b>9f</b>  | O | 119.0        | 103.6        | 135.0        | 112.4        | 84.1         | 92.1         | 100.6        | 76.4         | 81.8         |
| <b>10f</b> | S | 115.8        | 105.3        | 136.5        | 113.3        | 84.7         | 91.2         | 103.4        | 76.4         | 80.9         |

**Table S11. Bond angles of 9b and 10b in acetonitrile (calculated at the CPCM–MP2/6–31+G\* level)**

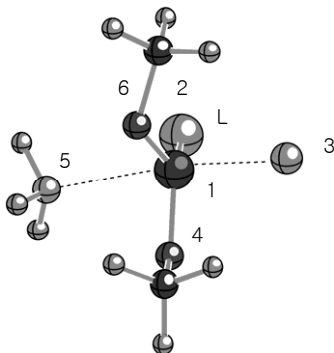

| substrate  | L | $\angle 216$ | $\angle 214$ | $\angle 614$ | $\angle 312$ | $\angle 314$ | $\angle 316$ | $\angle 512$ | $\angle 514$ | $\angle 516$ |
|------------|---|--------------|--------------|--------------|--------------|--------------|--------------|--------------|--------------|--------------|
| position   |   | e,e          | e,e          | e,e          | a,e          | a,e          | a,e          | a,e          | a,e          | a,e          |
| <b>9b</b>  | O | 125.9        | 120.9        | 108.4        | 100.3        | 95.6         | 95.3         | 85.8         | 81.4         | 80.7         |
| <b>10b</b> | S | 125.4        | 119.4        | 109.3        | 103.0        | 95.0         | 95.5         | 88.0         | 79.6         | 77.4         |
